# Supplementary material
Source: PubMed Central journal article supplement (PMC2937905)
Supplement: supp_M110.131318_jbc.M110.131318-1.pdf [file supp_M110.131318_jbc.M110.131318-1.pdf]

## Supplemental Data

### **CHARACTERIZATION OF C1Q IN TELEOSTS: INSIGHT INTO THE MOLECULAR AND FUNCTIONAL EVOLUTION OF C1Q FAMILY AND CLASSICAL PATHWAY**

**Yu-Lan Hu<sup>1,2</sup>, Xin-Min Pan<sup>1,2</sup>, Li-Xin Xiang<sup>1,2</sup>, and Jian-Zhong Shao<sup>1,2,3</sup>**

From College of Life Sciences, Zhejiang University, Hangzhou 310058, P. R. China<sup>1</sup>; Key Laboratory for Cell and Gene Engineering of Zhejiang Province, P. R. China<sup>2</sup>; Key Laboratory of Animal Epidemic Etiology and Immunology Prevention of Ministry of Agriculture, P. R. China<sup>3</sup>

Running head: Characterization of C1q in teleosts

Address correspondence to: Jian-Zhong Shao, PhD, College of Life Sciences, Zhejiang University, Hangzhou 310058, P. R. China. Fax: +86-571-88206582; E-mail: [shaojz@zju.edu.cn](mailto:shaojz@zju.edu.cn)

SUPPLEMENT TABLE S1. Oligonucleotide primers used to amplify Zebrafish C1qA, C1qB, C1qC genes and for expression analysis

| Primers          | Sequence (5'-3')           | Use                     |
|------------------|----------------------------|-------------------------|
| 3AD              | CTGATCTAGAGGTACCGGATCC     | 3'RACE                  |
| 5RT              | GGTTTTGCAATTCTC            | 5'RACE                  |
| C1qA-F1          | GCACAAAATTGACAGCGAGACAC    | 3'RACE                  |
| C1qA-F2          | CAGCGAGACACTGATGTTTTAGG    | 3'RACE, gene expression |
| C1qA-5F1         | ATCAGCACCAACACTGGATCC      | 5'RACE                  |
| C1qA-5F2         | AGCTGGCTCTCCTTTCTC         | 5'RACE                  |
| C1qB-F1          | CACTTTAAGGCCACCATCTG       | 3'RACE                  |
| C1qB-F2          | CTGTTTTCCAACAGCCTTCTTG     | 3'RACE, gene expression |
| C1qB-R           | GGGTAAATACAACAGAGTGACAG    | ORF                     |
| C1qB-5F1         | CACATCAAAGTAACCCTCACCATC   | 5'RACE                  |
| C1qB-5F2         | CCTTCACACCTGGCCTGCCTGGGA   | 5'RACE                  |
| C1qC-F1          | GTCTGAAGGATTGAGTGGCT       | 3'RACE                  |
| C1qC-F2          | GTTTGGCGGTCACCTCATT        | 3'RACE, gene expression |
| C1qC-5F1         | GAGACAGTCCACCAGAGCTCA      | 5'RACE                  |
| C1qC-5F2         | TCTACAAGGCCTGCTTCGCCG      | 5'RACE                  |
| C1qA-ER          | CAACCATCAGCAGGGTCCAGTC     | Gene expression         |
| C1qB-ER          | GGGTAAATACAACAGAGTGACAG    | Gene expression         |
| C1qC-ER          | GAAGCGTATCACCTTATTGG       | Gene expression         |
| $\beta$ -actin-F | AGGTCATCACCATCGGCAAT       | Gene expression         |
| $\beta$ -actin-R | GATGTCCACGTCGCACTTCA       | Gene expression         |
| ghA-Ex-F         | CGGAATTCAAAGCCAGTGAGAAACC  | Protein expression      |
| ghA-Ex-R         | CCGCTCGAGATTGCGATAGATAAA   | Protein expression      |
| ghB-Ex-F         | CGGAATTCGTTTTTCTCTTACAAA   | Protein expression      |
| ghB-Ex-R         | CCGCTCGAGGAGCATGAAGCCTGTA  | Protein expression      |
| ghC-Ex-F         | CCCAAGCTTTCTCAACTGCAGTCTGC | Protein expression      |
| ghC-Ex-R         | CCGCTCGAGATGAATCAGGAAACCTG | Protein expression      |

SUPPLEMENT TABLE S2. Percent amino acid similarity of C1A, C1qB and C1qC in different species.

|           | Human      | Human | Chimpanzee | Rhesus | Dog  | Bovine | Pig  | Horse | Mouse | Rat  | Opossum | Chicken | Zebrafish | Human | Rhesus | Dog  | Horse | Mouse | Rat  | Bovine | Chicken | Zebrafish | Human | Rhesus | Mouse | Rat  | Dog  | Horse | Platypus | Chicken | Zebrafish |      |
|-----------|------------|-------|------------|--------|------|--------|------|-------|-------|------|---------|---------|-----------|-------|--------|------|-------|-------|------|--------|---------|-----------|-------|--------|-------|------|------|-------|----------|---------|-----------|------|
| C1qA      | Human      |       | 98.9       | 91.7   | 81.6 | 77.1   | 68.8 | 72.2  | 72.9  | 75.6 | 62      | 49.2    | 38.7      | 39.8  | 37.2   | 38   | 38.7  | 38    | 38   | 38.3   | 32      | 29.7      | 37.7  | 36.6   | 36.2  | 37   | 37.7 | 37.4  | 36.2     | 40      | 37        |      |
|           | Chimpanzee |       |            | 92.9   | 81.2 | 77.1   | 69.5 | 73.3  | 73.7  | 76.3 | 62      | 49.2    | 38.7      | 39.5  | 36.8   | 37.6 | 39.1  | 37.6  | 37.6 | 39.1   | 32.3    | 30.1      | 37.7  | 36.6   | 37    | 37.4 | 37.7 | 37.4  | 36.2     | 40      | 37.7      |      |
|           | Rhesus     |       |            |        | 81.2 | 75.2   | 70.7 | 74.8  | 74.1  | 76.7 | 62.8    | 49.6    | 39.1      | 39.8  | 37.2   | 37.2 | 39.1  | 38    | 38   | 39.5   | 32.3    | 29.7      | 37.7  | 36.6   | 37    | 37.4 | 37.4 | 37    | 36.6     | 41.1    | 37.7      |      |
|           | Dog        |       |            |        |      | 77.4   | 73.7 | 76.3  | 73.7  | 77.1 | 65      | 50.4    | 39.8      | 39.8  | 36.8   | 37.6 | 39.1  | 38.7  | 38.7 | 38.7   | 33.1    | 29.3      | 37.7  | 36.6   | 35.8  | 36.6 | 38.5 | 38.1  | 35.8     | 40      | 36.6      |      |
|           | Bovine     |       |            |        |      |        | 73.3 | 74.1  | 69.2  | 73.7 | 62      | 53      | 40.2      | 40.2  | 37.6   | 38.3 | 39.1  | 37.6  | 38.3 | 38.3   | 32      | 31.2      | 35.5  | 34.3   | 34.3  | 35.5 | 36.6 | 35.5  | 34.7     | 39.6    | 35.5      |      |
|           | Pig        |       |            |        |      |        |      | 76.7  | 67.3  | 70.7 | 60.9    | 51.1    | 39.8      | 40.2  | 37.6   | 38.3 | 40.2  | 38    | 39.1 | 38     | 31.6    | 32        | 37.7  | 36.6   | 36.6  | 37.4 | 38.1 | 38.1  | 36.6     | 37.7    | 37        |      |
|           | Horse      |       |            |        |      |        |      |       | 68.8  | 72.9 | 62.4    | 54.5    | 39.5      | 39.5  | 36.1   | 37.2 | 38.3  | 36.8  | 38.7 | 40.2   | 31.6    | 31.2      | 38.1  | 37.7   | 37    | 37.7 | 39.2 | 37.7  | 35.8     | 39.2    | 38.5      |      |
|           | Mouse      |       |            |        |      |        |      |       |       | 89.8 | 61.3    | 50.4    | 40.2      | 37.2  | 33.5   | 36.5 | 37.6  | 37.2  | 36.5 | 37.2   | 32.3    | 30.5      | 36.6  | 35.5   | 35.1  | 35.1 | 34.7 | 34.3  | 33.2     | 37.4    | 34.7      |      |
|           | Rat        |       |            |        |      |        |      |       |       |      | 63.5    | 53      | 41        | 39.1  | 35.3   | 37.6 | 38.7  | 38.7  | 38.7 | 38.7   | 33.1    | 31.6      | 37.7  | 36.6   | 35.1  | 35.5 | 36.2 | 35.5  | 33.6     | 38.1    | 35.8      |      |
|           | Opossum    |       |            |        |      |        |      |       |       |      |         | 54.9    | 41        | 39.8  | 37.2   | 39.5 | 41.7  | 39.8  | 39.5 | 39.8   | 33.1    | 30.8      | 40.8  | 39.6   | 37    | 38.9 | 40.8 | 38.5  | 37       | 40      | 39.2      |      |
| Chicken   |            |       |            |        |      |        |      |       |       |      |         | 35.6    | 40.8      | 37.1  | 40.4   | 37.8 | 37.1  | 37.5  | 38.2 | 31.6   | 34.6    | 38.5      | 37.7  | 37.7   | 37.4  | 38.5 | 37.7 | 35.5  | 38.1     | 37      |           |      |
| Zebrafish |            |       |            |        |      |        |      |       |       |      |         |         | 32.2      | 30    | 31.8   | 33.7 | 33.3  | 34.5  | 36   | 28.9   | 29.3    | 32.5      | 32.1  | 32.1   | 33.6  | 33.2 | 31.7 | 30.9  | 34.3     | 33.6    |           |      |
| C1qB      | Human      |       |            |        |      |        |      |       |       |      |         |         |           |       | 78.7   | 84   | 79.5  | 80.6  | 79.1 | 73.1   | 49.6    | 35.3      | 50.6  | 50.2   | 47.5  | 46.8 | 50.2 | 47.2  | 46.4     | 48.7    | 40        |      |
|           | Rhesus     |       |            |        |      |        |      |       |       |      |         |         |           |       |        | 71.6 | 67.9  | 67.5  | 65.3 | 64.2   | 45.9    | 30.5      | 43.8  | 43.4   | 41.5  | 40.4 | 43.4 | 40.8  | 40.8     | 43      | 34.7      |      |
|           | Dog        |       |            |        |      |        |      |       |       |      |         |         |           |       |        |      | 79.1  | 78    | 77.6 | 72     | 50.4    | 36.5      | 49.8  | 49.8   | 47.2  | 45.3 | 49.1 | 47.5  | 44.9     | 47.5    | 39.6      |      |
|           | Horse      |       |            |        |      |        |      |       |       |      |         |         |           |       |        |      |       | 74.3  | 75.4 | 73.5   | 48.5    | 35.3      | 49.4  | 49.1   | 47.2  | 46.4 | 49.4 | 46.4  | 45.3     | 47.9    | 40        |      |
|           | Mouse      |       |            |        |      |        |      |       |       |      |         |         |           |       |        |      |       |       | 89.6 | 72.4   | 50.4    | 34.2      | 49.4  | 49.4   | 46.8  | 45.3 | 48.7 | 45.7  | 42.6     | 47.2    | 40.4      |      |
|           | Rat        |       |            |        |      |        |      |       |       |      |         |         |           |       |        |      |       |       |      | 70.9   | 49.2    | 35.3      | 48.7  | 48.7   | 46.4  | 45.3 | 49.1 | 46    | 43.4     | 47.2    | 39.6      |      |
|           | Bovine     |       |            |        |      |        |      |       |       |      |         |         |           |       |        |      |       |       |      |        |         | 48.9      | 35.7  | 46.4   | 46.4  | 44.2 | 43   | 45.7  | 43.4     | 41.5    | 44.9      | 40.4 |
|           | Chicken    |       |            |        |      |        |      |       |       |      |         |         |           |       |        |      |       |       |      |        |         |           | 25.9  | 38.9   | 39.6  | 38.1 | 37.7 | 39.6  | 37       | 35.8    | 38.9      | 34   |
|           | Zebrafish  |       |            |        |      |        |      |       |       |      |         |         |           |       |        |      |       |       |      |        |         |           |       | 35.1   | 35.1  | 33.6 | 34.3 | 34.7  | 32.8     | 33.6    | 37        | 30.9 |
| C1qC      | Human      |       |            |        |      |        |      |       |       |      |         |         |           |       |        |      |       |       |      |        |         |           |       | 96.6   | 74.3  | 78.1 | 83.8 | 79.2  | 62.6     | 59.2    | 48.3      |      |
|           | Rhesus     |       |            |        |      |        |      |       |       |      |         |         |           |       |        |      |       |       |      |        |         |           |       |        | 74.7  | 78.1 | 83.8 | 79.6  | 61.9     | 58.9    | 47.9      |      |
|           | Mouse      |       |            |        |      |        |      |       |       |      |         |         |           |       |        |      |       |       |      |        |         |           |       |        |       | 86.4 | 79.6 | 78.9  | 63       | 58.1    | 46.4      |      |
|           | Rat        |       |            |        |      |        |      |       |       |      |         |         |           |       |        |      |       |       |      |        |         |           |       |        |       |      |      | 84.2  | 83.8     | 65.7    | 61.9      | 46.8 |
|           | Dog        |       |            |        |      |        |      |       |       |      |         |         |           |       |        |      |       |       |      |        |         |           |       |        |       |      |      |       | 85.7     | 64.2    | 60.8      | 48.7 |
|           | Horse      |       |            |        |      |        |      |       |       |      |         |         |           |       |        |      |       |       |      |        |         |           |       |        |       |      |      |       |          | 63.4    | 58.9      | 46   |
|           | Platypus   |       |            |        |      |        |      |       |       |      |         |         |           |       |        |      |       |       |      |        |         |           |       |        |       |      |      |       |          |         | 62.6      | 46.8 |
|           | Chicken    |       |            |        |      |        |      |       |       |      |         |         |           |       |        |      |       |       |      |        |         |           |       |        |       |      |      |       |          |         |           |      |
| Zebrafish |            |       |            |        |      |        |      |       |       |      |         |         |           |       |        |      |       |       |      |        |         |           |       |        |       |      |      |       |          |         |           |      |

A

```

Mouse : --METSQGLVACVITIIIVVTVADIVRADYQDADANCRDQFGLKGRGSGAAGIRF--SIRGKGLDGGSSDGRKDNVGL : 84
Rat : --METSQGLVACVAVIIVVTVADIVCRADYQDQVAVIICRQDGLKGRGSGAAGIRF--SIRGKGLDGGSSDGRKDNVGL : 84
Human : --MEGFGQGLVLCVLAISVIASTVTRDVCRAIDGKGRGSAAGIRF--SIRGKGLDGGSSDGRKDNVGL : 84
Rhesus : --MEGFGQGLVLCVLAISVIASTVTRDVCRAIDGKGRGSAAGIRF--SIRGKGLDGGSSDGRKDNVGL : 84
Dog : --MEAFRGVILVLCVLAISVIASTVTRDVCRAIDGKGRGSAAGIRF--SIRGKGLDGGSSDGRKDNVGL : 84
Pig : MEAFRGVILVLCVLAISVIASTVTRDVCRAIDGKGRGSAAGIRF--SIRGKGLDGGSSDGRKDNVGL : 86
Horse : --MEAFRGVILVLCVLAISVIASTVTRDVCRAIDGKGRGSAAGIRF--SIRGKGLDGGSSDGRKDNVGL : 84
Bovine : --MEAFRGVILVLCVLAISVIASTVTRDVCRAIDGKGRGSAAGIRF--SIRGKGLDGGSSDGRKDNVGL : 84
Opossum : ---MALWALVACVLAISVIASTVTRDVCRAIDGKGRGSAAGIRF--SIRGKGLDGGSSDGRKDNVGL : 83
Chicken : --MGLSLWLVSSLAALVLCVIASTVTRDVCRAIDGKGRGSAAGIRF--SIRGKGLDGGSSDGRKDNVGL : 84
Zebrafish : ---MGPSSALVAFVWAGALVFPFQDGRK-HSNVADGPNSSDGLKGRGSGAAGIRF--SIRGKGLDGGSSDGRKDNVGL : 84

```

```

Mouse : ECGSGLDGSFQDCKKVKGNPNIRDDQDFAFSAIR--QNPPTLGVVVEIKVLTNDGSSYONHREVECAVPGVYFPEQVSKND : 170
Rat : ECGSGLDGSFQDCKKVKGNPNIRDDQDFAFSAIR--QNPPTLGVVVEIKVLTNDGSSYONHREVECAVPGVYFPEQVSKND : 170
Human : ECGSGLDGSFQDCKKVKGNPNIRDDQDFAFSAIR--RNPDMGCVVVEIKVLTNDGSSYONHREVECAVPGVYFPEQVSKND : 170
Rhesus : ECGSGLDGSFQDCKKVKGNPNIRDDQDFAFSAIR--RNPDMGCVVVEIKVLTNDGSSYONHREVECAVPGVYFPEQVSKND : 170
Dog : ECGSGLDGSFQDCKKVKGNPNIRDDQDFAFSAIR--RNPPTLGVVVEIKVLTNDGSSYONHREVECAVPGVYFPEQVSKND : 170
Pig : ECGSGLDGSFQDCKKVKGNPNIRDDQDFAFSAIR--QNPPTLGVVVEIKVLTNDGSSYONHREVECAVPGVYFPEQVSKND : 172
Horse : ECGSGLDGSFQDCKKVKGNPNIRDDQDFAFSAIR--RNPDMGCVVVEIKVLTNDGSSYONHREVECAVPGVYFPEQVSKND : 170
Bovine : ECGSGLDGSFQDCKKVKGNPNIRDDQDFAFSAIR--RNPDMGCVVVEIKVLTNDGSSYONHREVECAVPGVYFPEQVSKND : 170
Opossum : GGSGLDGSFQDCKKVKGNPNIRDDQDFAFSAIR--RNPDMGCVVVEIKVLTNDGSSYONHREVECAVPGVYFPEQVSKND : 169
Chicken : HGSGLDGSFQDCKKVKGNPNIRDDQDFAFSAIR--TMSLFRKGTVMENIITNDGSSYONHREVECAVPGVYFPEQVSKND : 170
Zebrafish : MCAIIEKPLPAFPRSSVGCADCAASEDFAFSMEVNEASQAYKQDVEIDKLSLNDGSSYONHREVECAVPGVYFPEQVSKND : 172

```

```

Mouse : LCLVYKSSGGGPRDLEPQNNKSKLPOVYAGCPMLLQDRDQVYERDF--AKRQLYQGSADNIFSGPLIFPSA : 245
Rat : LCLVYKSSGGGPRDLEPQNNKSKLPOVYAGCPMLLQDRDQVYERDF--AKRQLYQGSADNIFSGPLIFPSA : 245
Human : LCLVYKSSGGGPRDLEPQNNKSKLPOVYAGCPMLLQDRDQVYERDF--KKRQLYQGSADNIFSGPLIFPSA : 245
Rhesus : LCLVYKSSGGGPRDLEPQNNKSKLPOVYAGCPMLLQDRDQVYERDF--KKRQLYQGSADNIFSGPLIFPSA : 245
Dog : LCLVYKSSGGGPRDLEPQNNKSKLPOVYAGCPMLLQDRDQVYERDF--IKRQLYQGSADNIFSGPLIFPSA : 245
Pig : LCLVYKSSGGGPRDLEPQNNKSKLPOVYAGCPMLLQDRDQVYERDF--NKRQLYQGSADNIFSGPLIFPSA : 247
Horse : VCLVYKSSGGGPRDLEPQNNKSKLPOVYAGCPMLLQDRDQVYERDF--RQLYQGSADNIFSGPLIFPSA : 243
Bovine : LCLVYKSSGGGPRDLEPQNNKSKLPOVYAGCPMLLQDRDQVYERDF--SKRQLYQGSADNIFSGPLIFPSA : 244
Opossum : LCLVYKSSGGGPRDLEPQNNKSKLPOVYAGCPMLLQDRDQVYERDF--IKRQLYQGSADNIFSGPLIFPSA : 245
Chicken : LCLVYKSSGGGPRDLEPQNNKSKLPOVYAGCPMLLQDRDQVYERDF--IKRQLYQGSADNIFSGPLIFPSA : 243
Zebrafish : LCLVYKSSGGGPRDLEPQNNKSKLPOVYAGCPMLLQDRDQVYERDF--RQLYQGSADNIFSGPLIFPSA : 247

```

B

```

Human : -----MKIPIGSSIVPMLLGLLGLDLSOAGLSCDGPDAIFGICPIPEPIGPIGCTFPIKIKRCKLPGIAGDHGEPGKGRDDE : 80
Rhesus : -----MGKGFACWAVGGDQKQKALPSSGSGNFPFGPRAAGSKLLPLLLG----AASQDAFPGLPGIAGDHGEPGKGRDDE : 75
Dog : -----MKTDRGGLLALLLGLLGLDLSOAGLSCDGPDAIFGICPIPEPIGPIGCTFPIKIKRCKLPGIAGDHGEPGKGRDDE : 79
Horse : -----MKTDRGGLLALLLGLLGLDLSOAGLSCDGPDAIFGICPIPEPIGPIGCTFPIKIKRCKLPGIAGDHGEPGKGRDDE : 81
Mouse : -----MKTQSGEIVTHLLGLLGLDLSOAGLSCDGPDAIFGICPIPEPIGPIGCTFPIKIKRCKLPGIAGDHGEPGKGRDDE : 80
Rat : -----MKTQSGEIVTHLLGLLGLDLSOAGLSCDGPDAIFGICPIPEPIGPIGCTFPIKIKRCKLPGIAGDHGEPGKGRDDE : 80
Bovine : -----MKTDRGGLLALLLGLLGLDLSOAGLSCDGPDAIFGICPIPEPIGPIGCTFPIKIKRCKLPGIAGDHGEPGKGRDDE : 76
Chicken : MAVFAAPFKPKQRRFLYSKQKLSDEPCVYHFHRAASAITGVNACHRSPQDQCTNRDQKNRPSGQDGLVSHEDQDKGRDDE : 80
Zebrafish : -----MIFALMSAHVPOALVLLVTVSSMSKQAGNKGPEPTGPIPEVGTGDKDAKERSDPEB---NAVIMTFRKGRDDE : 76

```

```

Human : PCGPKVGRKGVPCGPKGCAICAFPCGKSGDYKATQKIASAPRIN--VPLRDPQRFRLHIVTMMNINYSRSGKPTQVYGLIYF : 168
Rhesus : PCGPKVGRKGVPCGPKGCAICAFPCGKSGDYKATQKIASAPRIN--VPLRDPQRFRLHIVTMMNINYSRSGKPTQVYGLIYF : 163
Dog : PCGPKVGRKGVPCGPKGCAICAFPCGKSGDYKATQKIASAPRIN--VPLRDPQRFRLHIVTMMNINYSRSGKPTQVYGLIYF : 167
Horse : PCGPKVGRKGVPCGPKGCAICAFPCGKSGDYKATQKIASAPRIN--VPLRDPQRFRLHIVTMMNINYSRSGKPTQVYGLIYF : 169
Mouse : PCGPKVGRKGVPCGPKGCAICAFPCGKSGDYKATQKIASAPRIN--VPLRDPQRFRLHIVTMMNINYSRSGKPTQVYGLIYF : 168
Rat : PCGPKVGRKGVPCGPKGCAICAFPCGKSGDYKATQKIASAPRIN--VPLRDPQRFRLHIVTMMNINYSRSGKPTQVYGLIYF : 168
Bovine : PCGPKVGRKGVPCGPKGCAICAFPCGKSGDYKATQKIASAPRIN--VPLRDPQRFRLHIVTMMNINYSRSGKPTQVYGLIYF : 164
Chicken : PCGPKVGRKGVPCGPKGCAICAFPCGKSGDYKATQKIASAPRIN--VPLRDPQRFRLHIVTMMNINYSRSGKPTQVYGLIYF : 178
Zebrafish : PCGPKVGRKGVPCGPKGCAICAFPCGKSGDYKATQKIASAPRIN--VPLRDPQRFRLHIVTMMNINYSRSGKPTQVYGLIYF : 166

```

```

Human : IYHASSRGLCVLHRSRER--AQRVVFCDAYNTPOVTHGAVLRLDQGNVGLCADRNKLLDMRGANSITSGPLIFDMEA : 251
Rhesus : IYHASSRGLCVLHRSRER--PQRVVFCDAYNTPOVTHGAVLRLDQGNVGLCADRNKLLDMRGANSITSGPLIFDMEA : 246
Dog : AYHASSRGLCVLHRSRER--AQRVVFCDAYNTPOVTHGAVLRLDQGNVGLCADRNKLLDMRGANSITSGPLIFDMEA : 250
Horse : AYHASSRGLCVLHRSRER--IQRVVFCDAYNTPOVTHGAVLRLDQGNVGLCADRNKLLDMRGANSITSGPLIFDMEA : 252
Mouse : IYHASSRGLCVLHRSRER--AQRVVFCDAYNTPOVTHGAVLRLDQGNVGLCADRNKLLDMRGANSITSGPLIFDMEA : 253
Rat : IYHASSRGLCVLHRSRER--AQRVVFCDAYNTPOVTHGAVLRLDQGNVGLCADRNKLLDMRGANSITSGPLIFDMEA : 253
Bovine : IYHASSRGLCVLHRSRER--PQRVVFCDAYNTPOVTHGAVLRLDQGNVGLCADRNKLLDMRGANSITSGPLIFDMEA : 247
Chicken : IYHASSRGLCVLHRSRER--AQRVVFCDAYNTPOVTHGAVLRLDQGNVGLCADRNKLLDMRGANSITSGPLIFDMEA : 261
Zebrafish : IYHASSRGLCVLHRSRER--AQRVVFCDAYNTPOVTHGAVLRLDQGNVGLCADRNKLLDMRGANSITSGPLIFDMEA : 242

```

C

```

Mouse : ---MVVGSQDQCCGLCLDILFPLADLPRSSASAGCYGICGMPGICGAGKDGHLGLGKGRGCGIPAVPQDQPKRGRGSGM : 81
Rat : ---MVVGSQDQCCGLCLDILFPLADLPRSSASAGCYGICGMPGICGAGKDGHLGLGKGRGCGIPAVPQDQPKRGRGSGM : 80
Human : ---MVVGSQDQCCGLCLDILFPLADLPRSSASAGCYGICGMPGICGAGKDGHLGLGKGRGCGIPAVPQDQPKRGRGSGM : 80
Rhesus : ---MVVGSQDQCCGLCLDILFPLADLPRSSASAGCYGICGMPGICGAGKDGHLGLGKGRGCGIPAVPQDQPKRGRGSGM : 80
Dog : ---MVVGSQDQCCGLCLDILFPLADLPRSSASAGCYGICGMPGICGAGKDGHLGLGKGRGCGIPAVPQDQPKRGRGSGM : 80
Horse : ---MVVGSQDQCCGLCLDILFPLADLPRSSASAGCYGICGMPGICGAGKDGHLGLGKGRGCGIPAVPQDQPKRGRGSGM : 80
Platypos : MWSSQDQCCGLCLDILFPLADLPRSSASAGCYGICGMPGICGAGKDGHLGLGKGRGCGIPAVPQDQPKRGRGSGM : 85
Chicken : ---MGQSPRDLHLILDLPRSSASAGCYGICGMPGICGAGKDGHLGLGKGRGCGIPAVPQDQPKRGRGSGM : 80
Zebrafish : ---MGQHLLILDLPRSSASAGCYGICGMPGICGAGKDGHLGLGKGRGCGIPAVPQDQPKRGRGSGM : 76

```

```

Mouse : EHRKNGPDSGSGDQDGRFSGSSESRVNOHDSQVTVRQDAVYDANAVHNSMVNPOGHVNSTGKPCVYGL : 166
Rat : EHRKNGPDSGSGDQDGRFSGSSESRVNOHDSQVTVRQDAVYDANAVHNSMVNPOGHVNSTGKPCVYGL : 165
Human : EHRKNGPDSGSGDQDGRFSGSSESRVNOHDSQVTVRQDAVYDANAVHNSMVNPOGHVNSTGKPCVYGL : 165
Rhesus : EHRKNGPDSGSGDQDGRFSGSSESRVNOHDSQVTVRQDAVYDANAVHNSMVNPOGHVNSTGKPCVYGL : 165
Dog : EHRKNGPDSGSGDQDGRFSGSSESRVNOHDSQVTVRQDAVYDANAVHNSMVNPOGHVNSTGKPCVYGL : 165
Horse : EHRKNGPDSGSGDQDGRFSGSSESRVNOHDSQVTVRQDAVYDANAVHNSMVNPOGHVNSTGKPCVYGL : 165
Platypos : EHRKNGPDSGSGDQDGRFSGSSESRVNOHDSQVTVRQDAVYDANAVHNSMVNPOGHVNSTGKPCVYGL : 170
Chicken : EHRKNGPDSGSGDQDGRFSGSSESRVNOHDSQVTVRQDAVYDANAVHNSMVNPOGHVNSTGKPCVYGL : 165
Zebrafish : EHRKNGPDSGSGDQDGRFSGSSESRVNOHDSQVTVRQDAVYDANAVHNSMVNPOGHVNSTGKPCVYGL : 161

```

```

Mouse : YVYFVHSHIAVLCVLDLNRGAKVAFCDHNSN--SRVSSGGVILVAV--SVVLANVNDYNGVWR--DSVSSGFLIFPD : 246
Rat : YVYFVHSHIAVLCVLDLNRGAKVAFCDHNSN--SRVSSGGVILVAV--SVVLANVNDYNGVWR--DSVSSGFLIFPD : 245
Human : YVYFVHSHIAVLCVLDLNRGAKVAFCDHNSN--SRVSSGGVILVAV--SVVLANVNDYNGVWR--DSVSSGFLIFPD : 245
Rhesus : YVYFVHSHIAVLCVLDLNRGAKVAFCDHNSN--SRVSSGGVILVAV--SVVLANVNDYNGVWR--DSVSSGFLIFPD : 245
Dog : YVYFVHSHIAVLCVLDLNRGAKVAFCDHNSN--SRVSSGGVILVAV--SVVLANVNDYNGVWR--DSVSSGFLIFPD : 245
Horse : YVYFVHSHIAVLCVLDLNRGAKVAFCDHNSN--SRVSSGGVILVAV--SVVLANVNDYNGVWR--DSVSSGFLIFPD : 245
Platypos : YVYFVHSHIAVLCVLDLNRGAKVAFCDHNSN--SRVSSGGVILVAV--SVVLANVNDYNGVWR--DSVSSGFLIFPD : 250
Chicken : YVYFVHSHIAVLCVLDLNRGAKVAFCDHNSN--SRVSSGGVILVAV--SVVLANVNDYNGVWR--DSVSSGFLIFPD : 245
Zebrafish : YVYFVHSHIAVLCVLDLNRGAKVAFCDHNSN--SRVSSGGVILVAV--SVVLANVNDYNGVWR--DSVSSGFLIFPD : 244

```

SUPPLEMENTAL FIGURE S1. Multiple alignment of the predicted amino acid sequence of zebrafish (A) C1qA, (B) C1qB, and (C) C1qC with other known C1qA, C1qB, or C1qC. Residues shaded in black are completely conserved across all species aligned, and residues shaded in grey are similar with respect to side chains. Dashes in the amino acid sequences indicate gaps introduced to maximize alignment. Upward arrows indicate the four conserved cysteine residues in different species. GenBank accession numbers used in the alignment are as follows: C1qA genes: human, [P02745](#); rat, [P31720](#); dog, [XP\\_535367](#); horse, [XP\\_001504311](#); pig, [Q69DL0](#); bovine, [Q5E9E3](#); opossum, [XP\\_001376435](#); chicken, [XP\\_417654](#); rhesus, [XP\\_001101837](#); mouse, [P98086](#). C1qB genes: human, [P02746](#); rat, [P31721](#); dog, [XP\\_544507](#); horse, [XP\\_001501545](#); bovine, [Q2KIV9](#); chicken, [XP\\_425756](#); rhesus, [XP\\_001110783](#); mouse, [P14106](#). C1qC genes: human, [P02747](#); rat, [P31722](#); dog, [XP\\_544508](#); horse, [XP\\_001504308](#); chicken, [XP\\_417653](#); rhesus, [XP\\_001102196](#); platypus, [Contig16630:880-2400](#); mouse, [Q02105](#).

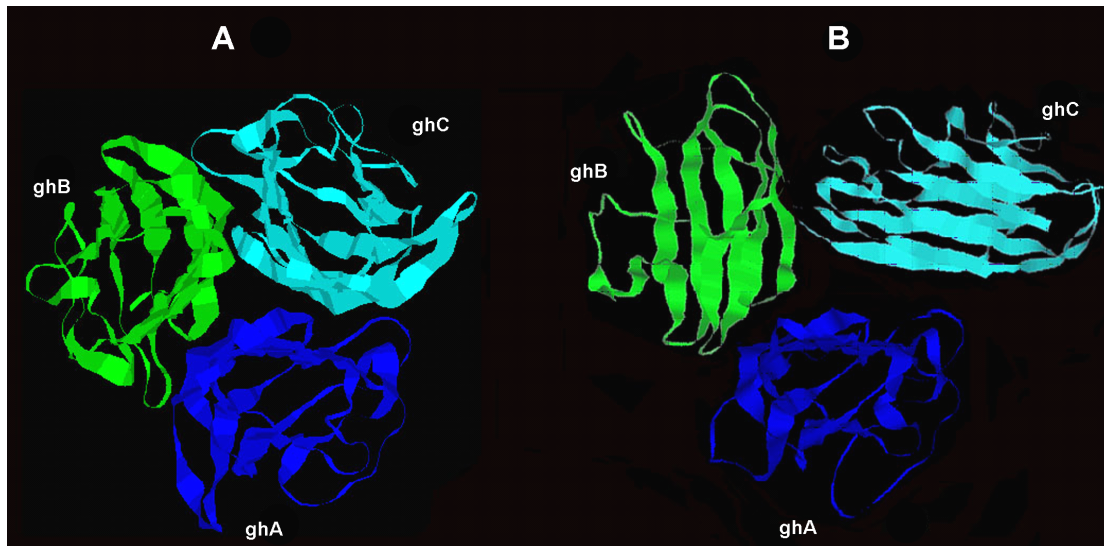

SUPPLEMENTAL FIGURE S2. Structural features of C-terminal globular region (gC1q) signature domains. (A) Superimposed structure of modules A, B, and C of human C1q (Protein Data Bank (PDB) code 1pk6). (B) Modeled 3D structure of zebrafish ghA, ghB, and ghC using human ghA, ghB, or ghC as template, respectively.

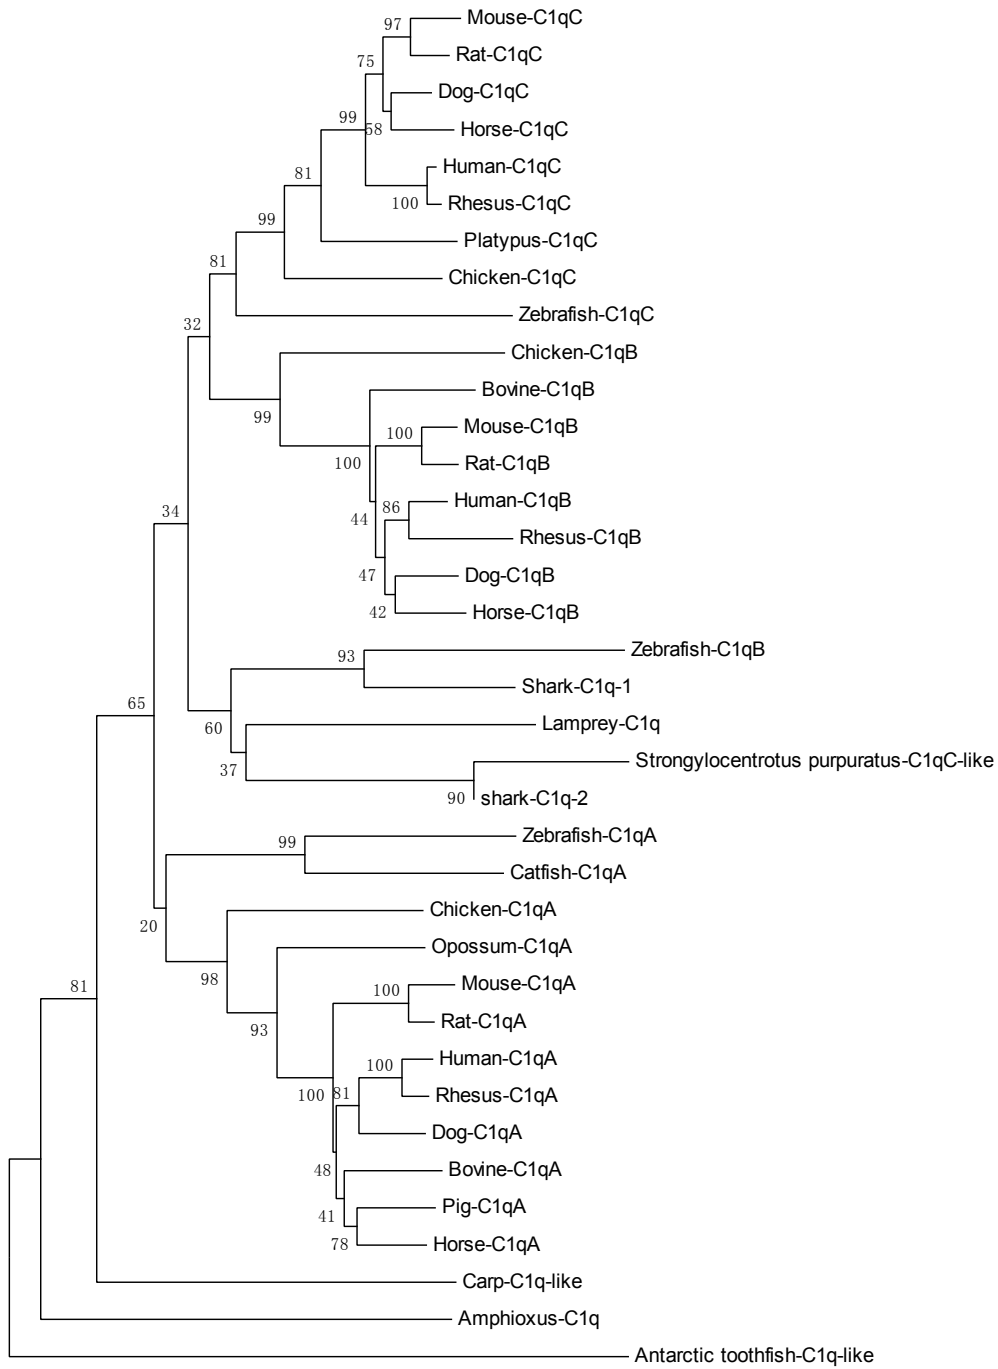

SUPPLEMENTAL FIGURE S3. Phylogenetic tree constructed with neighbor-joining method from Clustal W-generated alignments of C1q sequences. Node values represent percent bootstrap confidence derived from 2000 replicates. The accession numbers are as follows: lamprey C1q, [BAD22833.1](#); Chinese perch C1q-like-1, [ABV57765.1](#); Chinese perch C1q-like-2, [ABV57766.1](#); catfish C1qA, [BM425331.1](#); carp C1q-like, [BAD22535.1](#); amphioxus C1q, [FJ154079.1](#); Antarctic toothfish, [ABN45966.1](#); stronglylacentrotus purpuratus, [XP\\_782700.1](#). The sequences of shark C1q1 and C1q2 were from Smith *et al.* (39). The other sequence accession numbers are shown in Fig. S6.



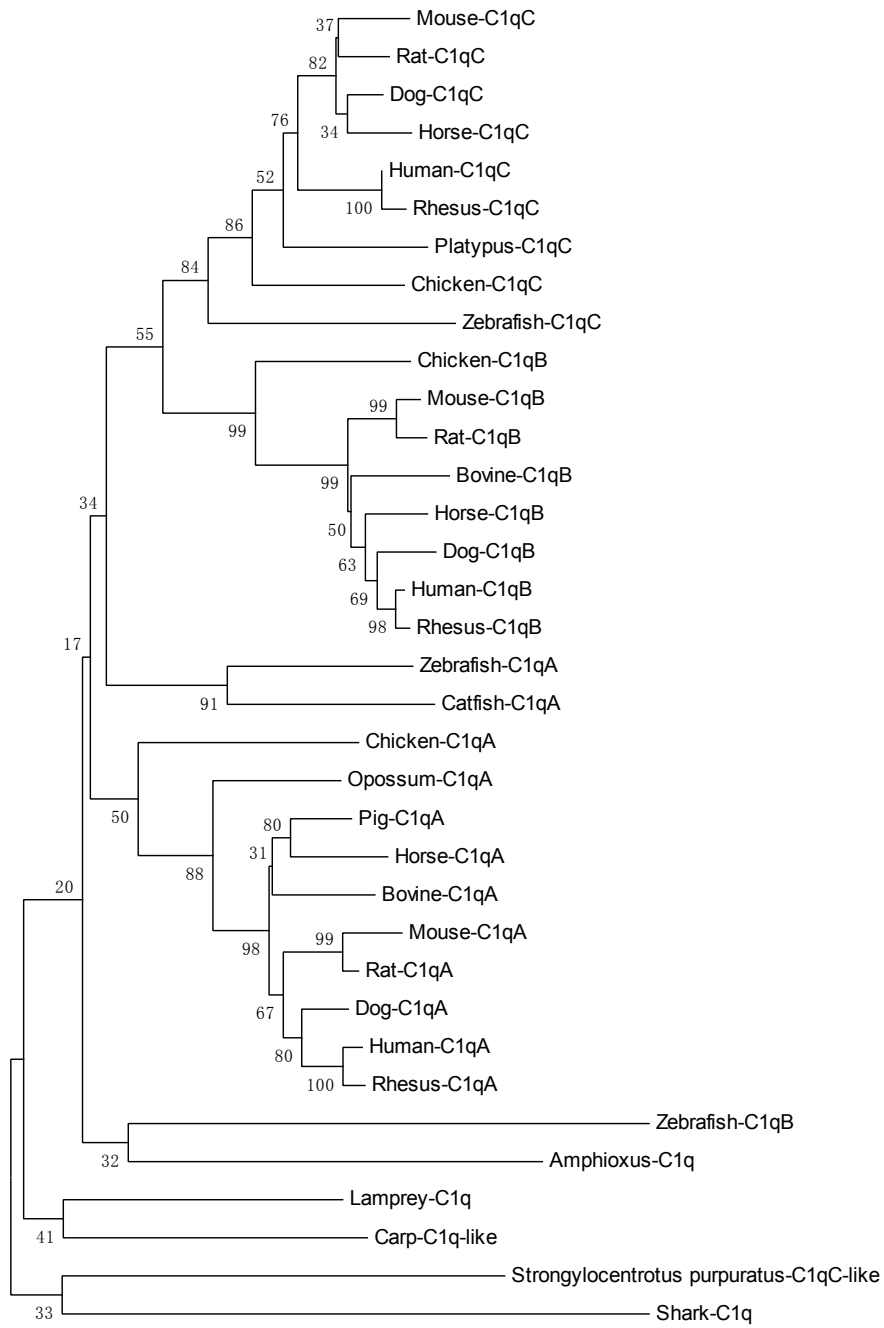

SUPPLEMENTAL FIGURE S4. Phylogenetic tree showing the relationship between zebrafish C1q amino acid sequences and those from other species. It was constructed using C1q globular head domain sequences from different species. Bootstrap values were calculated from 2000 repetitions. Node values represent percent bootstrap confidence. GenBank accession numbers used in the alignment are as described above.

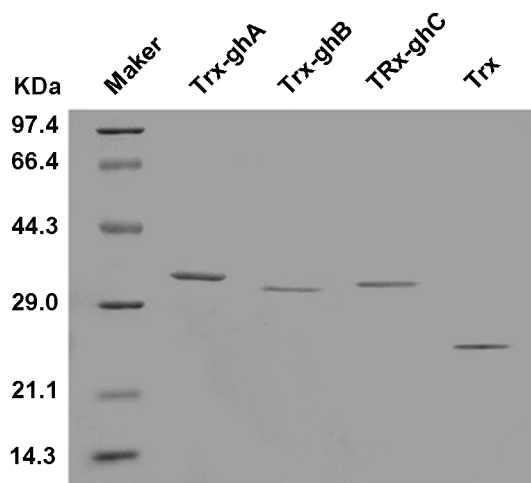

SUPPLEMENTAL FIGURE S5. SDS-PAGE analysis of purified fusion proteins.

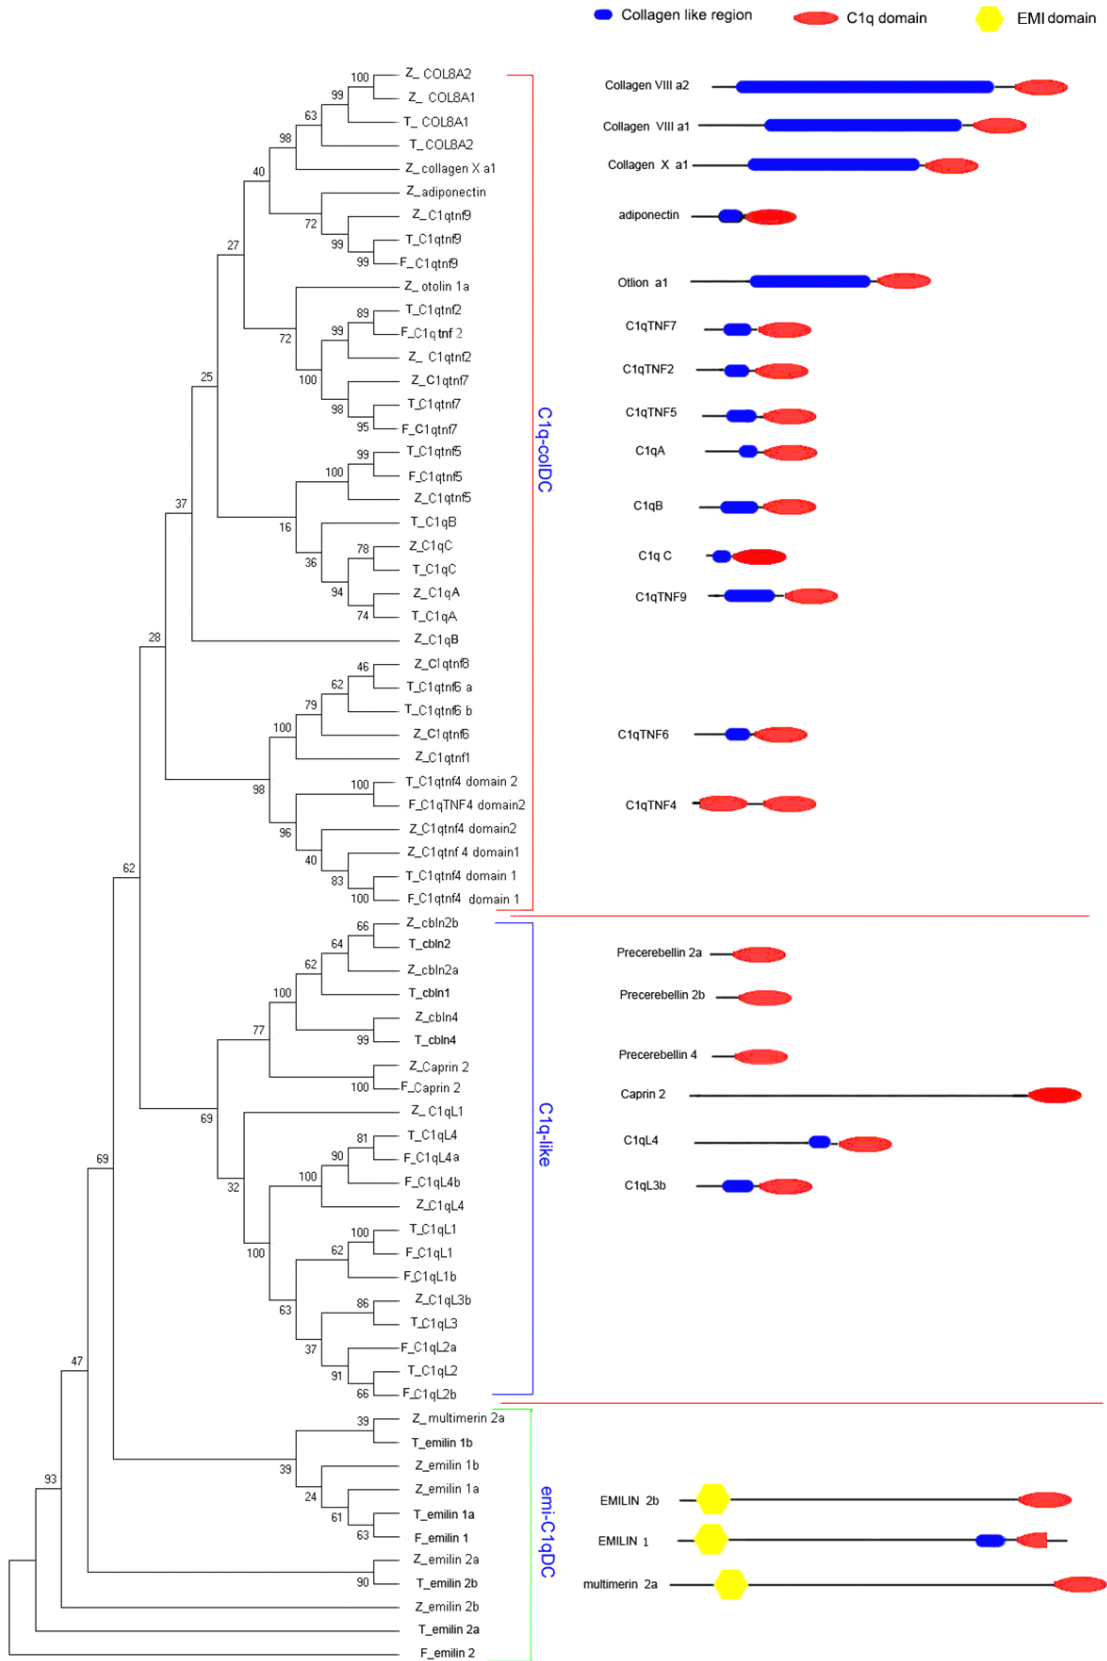

SUPPLEMENTAL FIGURE S6. Phylogenetic trees constructed by neighbor-joining method using MEGA4.0 program and schematic diagrams representing domain structures of C1qDC proteins. Selected C1qDC-encoding sequences are from zebrafish (Z), fugu (F), and tetraodon (T). Proteins with similar domain organization are grouped together. The EMI domain, collagen-like region, and C1q domain are indicated. The sequence accession number in Genbank or Ensemble are as follows:

Z\_adiponectin, NP\_001038890.1; Z\_collagen X a1, AAX54479.1; Z\_otolin 1a, NP\_001093211.1; Z\_C1qtnf4, NP\_001017702; Z\_caprin2, NP\_001013291.1; Z\_cbln2a, NP\_001122160.1; Z\_cbln2b, NP\_001092208.1; Z\_cbln4, NP\_001103861.1; Z\_C1qtnf9, NP\_001107934.1; Z\_C1qtnf2, XP\_700791.1; Z\_COL8A2, XP\_690914.3; Z\_COL8A1, NP\_001135846.1; Z\_C1qL4, XP\_695928.3; Z\_C1qL3b, NP\_991264.1; Z\_C1qtnf6, XP\_699453.2; Z\_C1qtnf5, NP\_001025124.1; Z\_C1qtnf8, XP\_693502.3; Z\_C1qtnf7, XP\_693031.2; Z\_emilin2a, XP\_001341669.2; Z\_emilin2b, XP\_700066.3; Z\_multimerin2a, XP\_001923804.1; Z\_C1qtnf1, NP\_001017875.1; Z\_emilin1b, ENSDARP00000033239; Z\_emilin1a, NP\_001025378.1; Z\_C1qL1, XP\_699016.3; T\_C1qtnf2, ENSTNIP00000011863; T\_C1qtnf4, emb|CAG03423.1; T\_C1qtnf5, ENSTNIP00000010609; T\_C1qtnf6a, emb|CAG12528.1; T\_C1qtnf6b, emb|CAF95529.1; T\_C1qtnf7, emb|CAG10999.1; T\_C1qtnf9, emb|CAG04206.1; T\_COL8A1, emb|CAG00884.1; T\_COL8A2, emb|CAF99434.1; T\_C1qA, emb|CAF95737.1; T\_C1qC, emb|CAF95736.1; T\_C1qB, mRNACR720865partial; T\_cbln1, GSTENP00008752001; T\_cbln2, GSTENP00015542001; T\_cbln4, GSTENP00023416001; T\_C1qL2, GSTENP00035278001; T\_C1qL1, GSTENP00022029001; T\_C1qL3, GSTENP00027650001; T\_C1qL4, GSTENP00028104001; T\_emilin1a, STENP00035501001; T\_emilin1b, GSTENP00019367001; T\_emilin2a, GSTENP00034516001; T\_emilin2b, GSTENP00031781001; F\_C1qL1, ENSTRUP00000038558; F\_C1qL4b, NSTRUP00000012152; F\_C1qL1b, ENSTRUP00000033292; F\_C1qL2a, ENSTRUP00000003096; F\_C1qL2b, ENSTRUP00000032791; F\_C1qL4a, ENSTRUP00000034386; F\_Caprin2, ENSTRUP00000032753; F\_C1qtnf2, ENSTRUP00000002973; F\_C1qtnf7, ENSTRUP00000035837; F\_C1qtnf9, ENSTRUP00000018781; F\_C1qtnf4, ENSTRUP00000018012; F\_C1qtnf5, ENSTRUP00000038969; F\_emilin1, ENSTRUP00000002880; F\_emilin2, ENSTRUP00000025497.

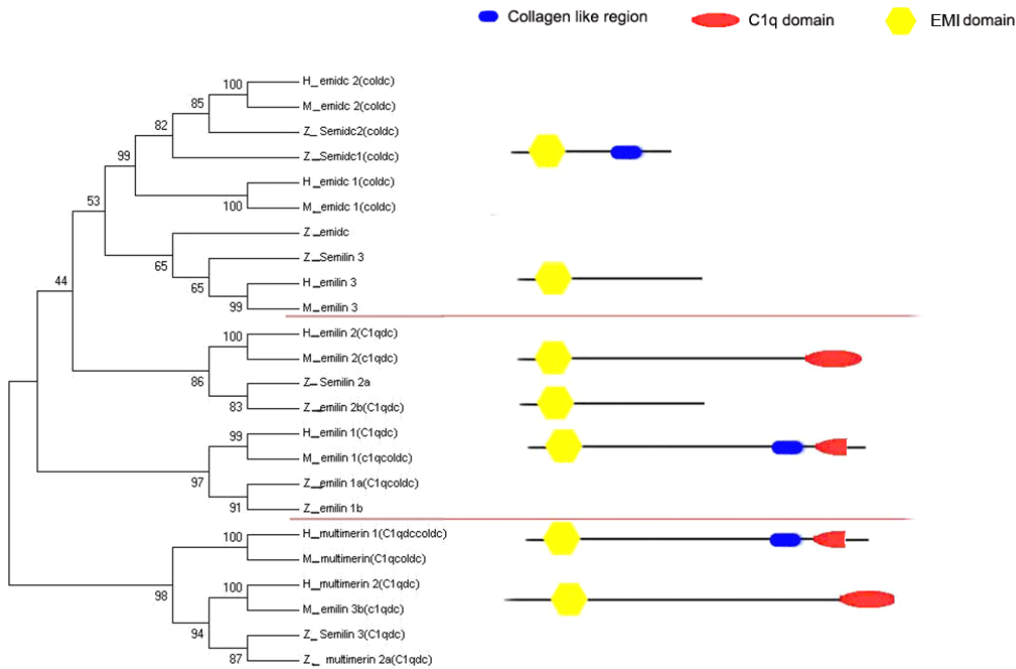

SUPPLEMENTAL FIGURE S7. Emu family phylogenetic tree constructed using EMI domain sequences by neighbor-joining method using MEGA4.0 program. Sequence accession number in Genbank or Ensemble are as follows: H\_emiLin, NP\_008977; H\_emiLin3, NP\_443078.1; H\_emiLin2, NP\_114437.2; H\_emiDC2, NP\_597714.2; H\_emiDC1, NP\_597712.2; H\_multimerin1, NP\_031377.2; H\_multimerin2, NP\_079032.1; Z\_emiLin1a, NP\_001025378.1; Z\_emiLin1b, NP\_001038807.1; Z\_Semilin2, XP\_687089.3; Z\_SemiDC2, XP\_001920406.1; Z\_Semilin3, XP\_683693.3; Z\_emiLin2b, XP\_700066.3; Z\_SemiDC1, XP\_001337708.2; Z\_Semilin3, XP\_694616.2; Z\_multimerin2a, XP\_001923804.1; M\_emiLin1, NP\_598679.1; M\_emiLin3, NP\_878260.1; M\_emiLin2, NP\_660140.1; M\_emiDC2, NP\_077794.2; M\_emiDC1, NP\_542162.1; M\_emiLin3, NP\_694767.3; M\_multimerin1, XP\_284198.1. Abbreviations: H, Human; Z, zebrafish; M, mouse; C1qdc, C1q-domain-containing sequences; col, collagen-like sequence; C1qcoldc, C1q-collagen-domain-containing sequences.
